# Supplementary material
Source: MDPI journal article supplement (https://www.mdpi.com/2073-4344/7/5/136)
Supplement: s1 [file s1]

# Supplementary Materials: Photocatalytic Graphene-TiO<sub>2</sub> Thin Films Fabricated by Low-Temperature Ultrasonic Vibration-Assisted Spin and Spray Coating in a Sol-Gel Process

Fatemeh Zabihi, Mohammad-Reza Ahmadian-Yazdi and Morteza Eslamian

**Table S1.** Experimental conditions used for the fabrication of graphene, TiO<sub>2</sub>, and graphene-TiO<sub>2</sub> thin films via spin coating followed by substrate vibration post treatment (spin-SVPT) and substrate vibration-assisted spray coating (SVASC). GD stands for graphene disperse and TS stands for TiO<sub>2</sub> precursor solution.

| TS:GD Volume Ratio    | Casting Method | Annealing Temp. (°C) |
|-----------------------|----------------|----------------------|
| TiO <sub>2</sub> film | Spin-SVPT      | 150                  |
| graphene film         | Spin-SVPT      | 150                  |
| graphene film         | Spin-SVPT      | 450                  |
| 1:4                   | Spin           | 150                  |
| 1:4                   | Spray          | 150                  |
| 1:9                   | Spin-SVPT      | 150                  |
| 1:9                   | Spin-SVPT      | 450                  |
| 1:4                   | Spin-SVPT      | 150                  |
| 1:4                   | Spin-SVPT      | 450                  |
| 1:4                   | SVASC          | 150                  |
| 1:4                   | SVASC          | 450                  |

500 nm

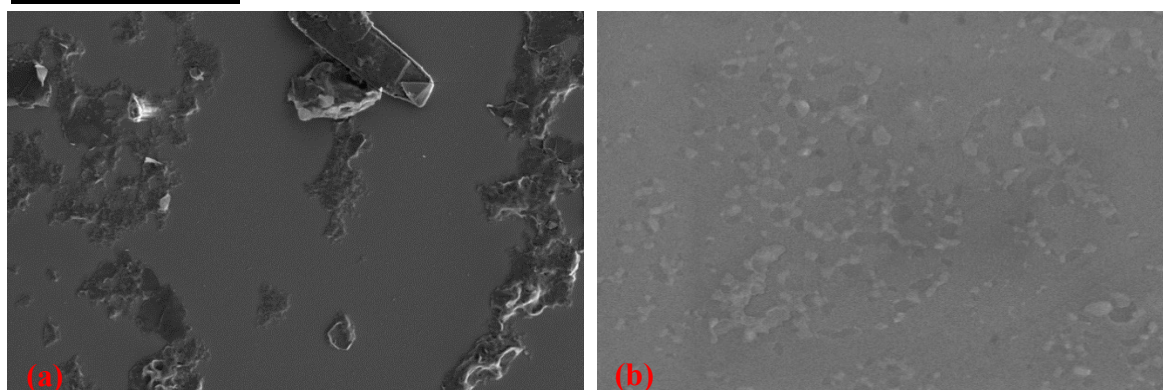

**Figure S1.** Surface morphology of graphene-TiO<sub>2</sub> thin films prepared by conventional spin (a) and spray (b) coating. Both films were deposited from precursor solution with TS:GD volume ratio of 1:4, and the films were annealed at 150 °C.

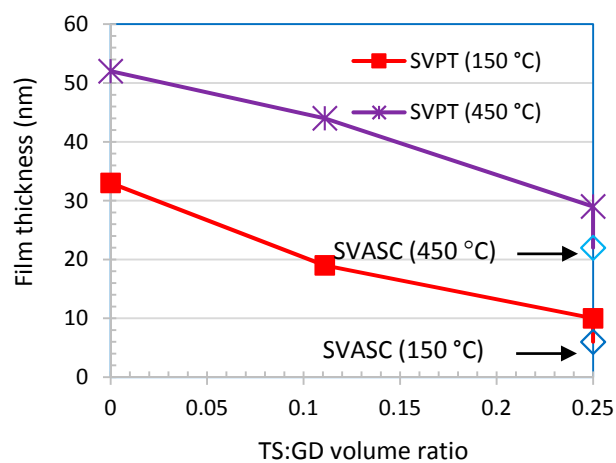

**Figure S2.** Effect of precursor composition and annealing temperature on the thickness of graphene-TiO<sub>2</sub> composite thin films.

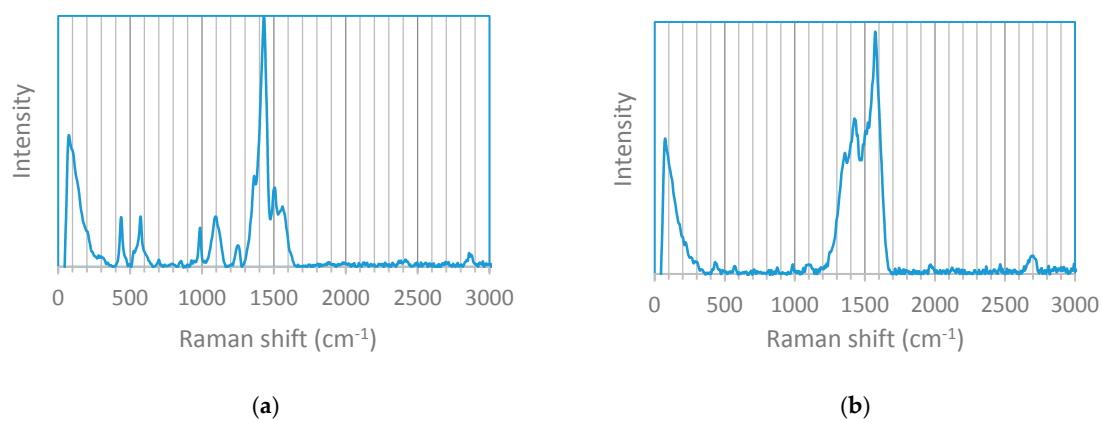

**Figure S3.** Raman spectra of graphene-TiO<sub>2</sub> thin films, deposited from the precursor solution with TS:GD volume ratio of 1:4. (a) Spin-SVPT, and (b) SVASC, both annealed at 450 °C.

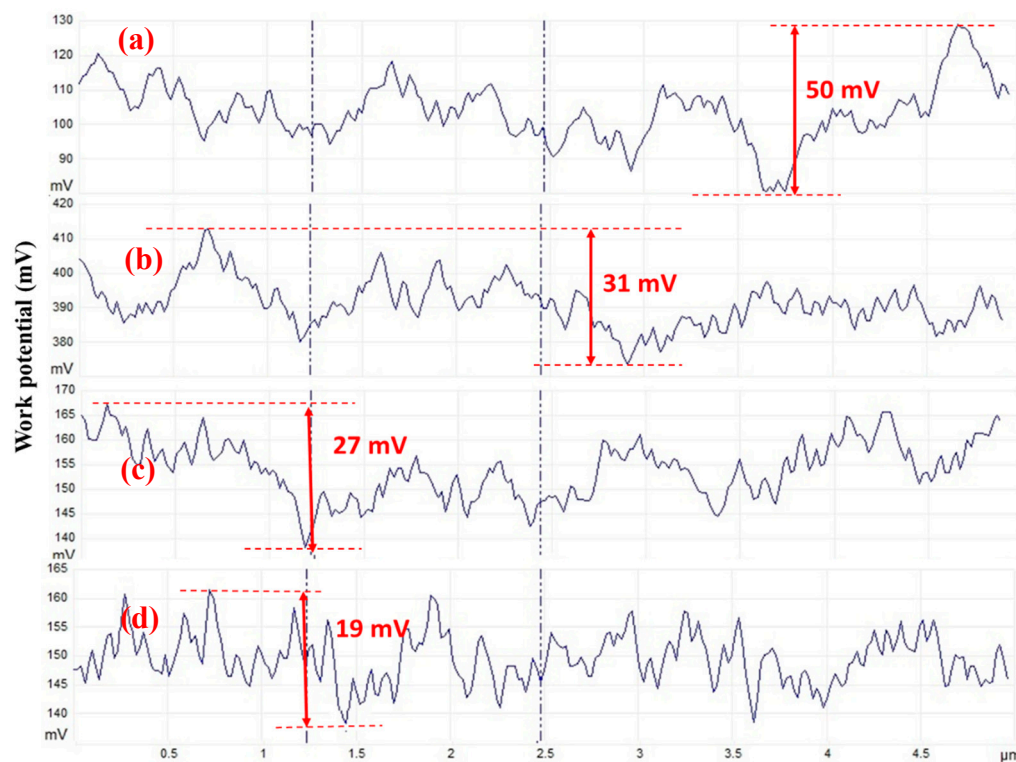

**Figure S4.** Line potential profiles of graphene-TiO<sub>2</sub> films with various TiO<sub>2</sub> contents (TS:GD vol. ratio), annealed at 150°C. (a) spin-SVPT graphene, (b) spin-SVPT graphene-TiO<sub>2</sub> at TS:GD = 1:9, (c) spin-SVPT graphene-TiO<sub>2</sub> at TS:GD = 1:4, and (d) SVASC graphene-TiO<sub>2</sub> thin film at TS:GD = 1:4. The line profiles were obtained along the lines shown on the AFM potential images of Figure 9.

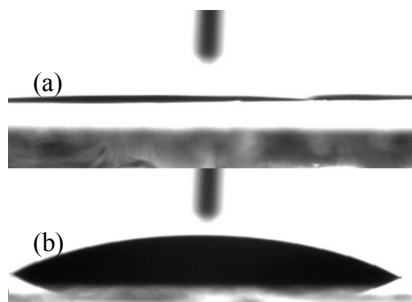

**Figure S5.** Contact angle measurement tests of water droplets on (a) graphene-TiO<sub>2</sub> thin films fabricated by spin-SVPT using a solution with TS:GD volume ratio of 1:4 and annealed at 150°C, and (b) graphene deposited by spin-SVPT and annealed at 150 °C.
